# Supplementary material
Source: PubMed Central journal article supplement (PMC5840018)
Supplement: NIHMS935633-supplement-2.pdf [file NIHMS935633-supplement-2.pdf]

**GlcNAc-1-P-transferase-tunicamycin complex structure reveals basis  
for inhibition of N-glycosylation**

**Supplementary Note 1: Chemical synthesis of Tunicamycin-MurNAc**

Jiho Yoo<sup>1\*</sup>, Ellene H. Mashalidis<sup>1\*</sup>, Alvin C. Y. Kuk<sup>1\*</sup>, Kazuki Yamamoto<sup>2</sup>, Benjamin Kaeser<sup>1</sup>,  
Satoshi Ichikawa<sup>2</sup>, Seok-Yong Lee<sup>1†</sup>

## General experimental methods

All reactions except those carried out in aqueous phase were performed under argon atmosphere, unless otherwise noted. Materials were purchased from commercial suppliers and used without further purification, unless otherwise noted. Solvents were distilled according to the standard protocol. Isolated yields were calculated by weighting products. The weight of the starting materials and the products were not calibrated. Analytical thin layer chromatography (TLC) was performed on Merck silica gel 60F<sub>254</sub> plates. Normal-phase column chromatography was performed on Merck silica gel 5715 or Wakogel 60N. Flash column chromatography was performed on Kanto Chemical Silica Gel 60N (spherical, neutral, 40-50  $\mu\text{m}$ ). <sup>1</sup>H NMR were measured in CDCl<sub>3</sub>, DMSO-*d*<sub>6</sub> and methanol-*d*<sub>4</sub> solution, and reported in parts per million ( $\delta$ ) relative to tetramethylsilane (0.00 ppm) as internal standard using JEOL ECS400, ECX400, ECA500, unless otherwise noted. <sup>13</sup>C NMR were measured in CDCl<sub>3</sub> or methanol-*d*<sub>4</sub> solution, and referenced to residual solvent peaks of CDCl<sub>3</sub> (77.16 ppm) or methanol-*d*<sub>4</sub> (49.00 ppm) using ECS400, ECX400, ECA500. Coupling constant (*J*) was reported in hertz (Hz). Abbreviations of multiplicity were as follows; s: singlet, d: doublet, t: triplet, q: quartet, m: multiplet, br: broad. Data were presented as follows; chemical shift (multiplicity, integration, coupling constant). Assignment was based on <sup>1</sup>H-<sup>1</sup>H COSY spectra. Mass spectra were obtained on Waters MICRO MASS LCT-premier and mass analyzer type used for the HRMS measurements was TOF. Optical rotation was measured on a Rudolph Research Analytical Autopol IV automatic polarimeter.

**Scheme 1. Preparation of tunicamycin MurNAc analogue**

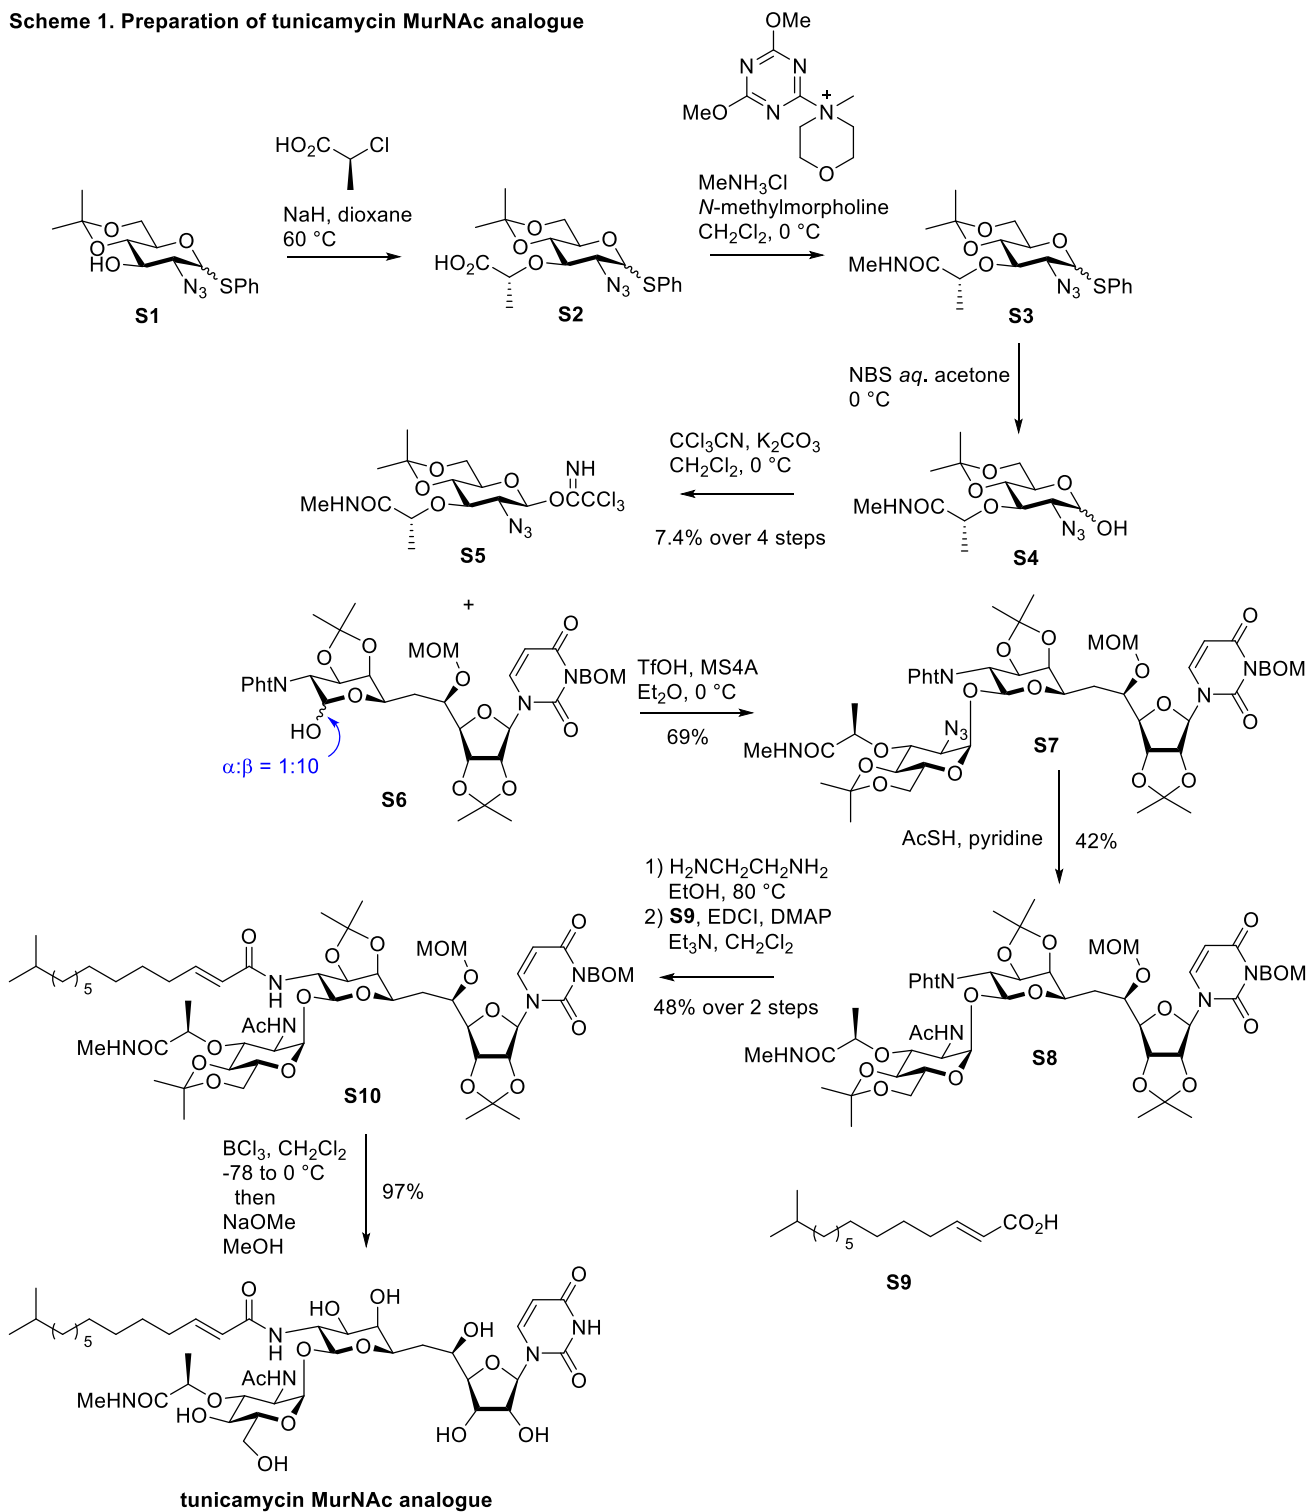

2-Azido-2-deoxy-3-O-[(R)-1-(methylaminocarbonyl)ethyl]-4,6-isopropylidene- $\beta$ -D-glucopyranosyl trichloroacetimidate (**S5**)

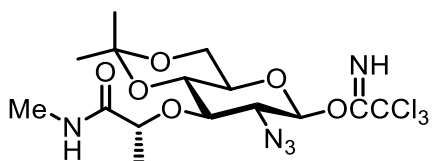

A solution of **S1** (200 mg, 0.593 mmol) in 1,4-dioxane (12 mL) was treated with NaH (60% dispersion in mineral oil, 47.4 mg) at room temperature, and the mixture was heated to 60 °C for 30 min. To the mixture was added (*S*)-2-chloropropionic acid (204  $\mu$ L, 2.37 mmol) and additional NaH (119 mg) at 60 °C, and the resulting mixture was heated to 70 °C for 3 h. The reaction mixture was cooled and partitioned between hexane and H<sub>2</sub>O. The aqueous layer was acidified with *conc.* HCl at a cooling-bath. The mixture was extracted with EtOAc, and the organic layer was washed with brine, dried over Na<sub>2</sub>SO<sub>4</sub>, filtered and concentrated *in vacuo*. A solution of **S2**, MeNH<sub>2</sub>·HCl (94.5 mg, 1.40 mmol) and *N*-methylmorpholine (154  $\mu$ L, 1.40 mmol) in CH<sub>2</sub>Cl<sub>2</sub> (2 mL) was treated with 4-(4,6-dimethoxy-1,3,5-triazin-2-yl)-4-methylmorpholinium chloride (DMT-MM, 438 mg, 1.40 mmol) at 0 °C and stirred at room temperature for 3 h. The reaction mixture was partitioned between EtOAc and 1 M *aq.* HCl, and the organic layer was washed with *sat. aq.* NaHCO<sub>3</sub> and brine, dried over Na<sub>2</sub>SO<sub>4</sub>, filtered and concentrated *in vacuo*. A solution of **S3** in acetone/H<sub>2</sub>O (v/v 5/1, 3 mL) was treated with *N*-bromosuccinimide (NBS, 211 mg, 1.19 mmol) at 0 °C for 20 min. The reaction was quenched with *sat. aq.* Na<sub>2</sub>S<sub>2</sub>O<sub>3</sub>/*sat. aq.* NaHCO<sub>3</sub> (v/v 1/1), and the resulting mixture was extracted with CH<sub>2</sub>Cl<sub>2</sub>. The organic layer was washed with 0.1 M *aq.* NaOH (three times) and brine, dried over Na<sub>2</sub>SO<sub>4</sub>, filtered and concentrated *in vacuo*. A solution of **S4** in CH<sub>2</sub>Cl<sub>2</sub>/CCl<sub>3</sub>CN (v/v 4/1, 1.25 mL) was treated with K<sub>2</sub>CO<sub>3</sub> powder (9.9 mg, 71.7  $\mu$ mol) at 0 °C and stirred at room temperature for 17 h. The insoluble solid was filtered off through a Celite pad and washed with CH<sub>2</sub>Cl<sub>2</sub>. The filtrate was concentrated *in vacuo*, and the residue was purified by silica gel column chromatography ( $\phi$ 0.8 $\times$ 8 cm, treated with Et<sub>3</sub>N; hexane/EtOAc = 3/2  $\rightarrow$  1/1) to afford **S5** (20.9 mg, 7.4% over 4 steps,  $\alpha/\beta$  = 1/20) as a white foam.

<sup>1</sup>H NMR (CDCl<sub>3</sub>, 500 MHz)  $\delta$  8.84 (s, 1H, imidate NH), 7.20 (br s, 1H, amide NH), 5.77 (d, 1H, H-1,  $J_{1,2}$  = 8.3 Hz), 4.41 (q, 1H, CH,  $J_{CH,Me}$  = 6.9 Hz), 3.98 (dd, 1H, H-6,  $J_{gem}$  = 10.8,  $J_{6,5}$  = 5.7 Hz), 3.79 (t, 1H, H-6,  $J$  = 10.3 Hz), 3.75 (t, 1H, H-4,  $J$  = 9.2 Hz), 3.67 (dd, 1H, H-2,  $J_{2,3}$  = 9.7,  $J_{2,1}$  = 8.3 Hz), 3.41-3.35 (m, 2H, H-3, H-5), 2.86 (d, 3H, N-CH<sub>3</sub>,  $J$  = 5.2 Hz), 1.51 (s, 3H, isopropylidene), 1.39 (s, 3H, isopropylidene), 1.41 (d, 3H, CH-CH<sub>3</sub>,  $J_{CH3,CH}$  = 6.9 Hz).

3-(Benzyloxymethyl)-1-((1*S*)-6,10-dideoxy-11-O-[(2-azido-2-deoxy-4,6-O-isopropylidene-3-O-[(*R*)-1-(methylaminocarbonyl)ethyl]- $\alpha$ -D-gluco-hexopyranosyl]-2,3:8,9-di-O-isopropylidene-5-O-(methoxymethyl)-10-phthalimido-L-galacto- $\beta$ -D-allo-undecodialdo-1,4-furanose-11,7-pyranose-1-yl)uracil (**S7**)

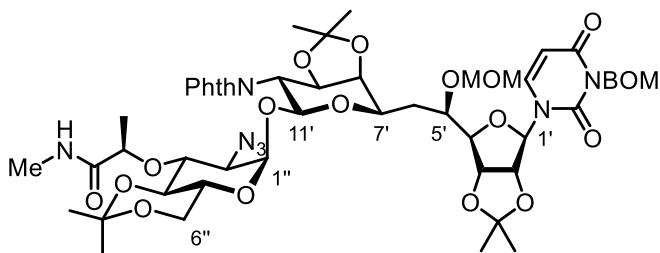

A solution of **S5** (20.5 mg, 43.2  $\mu$ mol), **S6** (20.0 mg, 25.6  $\mu$ mol) and molecular sieves 4A (50 mg) in Et<sub>2</sub>O (1 mL) was treated with TfOH (0.1 M in Et<sub>2</sub>O, 102  $\mu$ L, 40 mol%) at 0 °C for 2 h. To the reaction mixture was added CH<sub>2</sub>Cl<sub>2</sub> (0.2 mL) and stirred at 0 °C for 7.5 h. The reaction was quenched with Et<sub>3</sub>N (50  $\mu$ L) and the mixture was warmed to room temperature. The insoluble solid was filtered off through a Celite pad and washed with EtOAc. The filtrate was washed with *sat. aq.* NaHCO<sub>3</sub> and brine, dried over Na<sub>2</sub>SO<sub>4</sub>, filtered and concentrated *in*

*vacuo*. The filtrate was washed with *sat. aq.* NaHCO<sub>3</sub> and brine, dried over Na<sub>2</sub>SO<sub>4</sub>, filtered and concentrated *in*

*vacuo*. The residue was purified by preparative TLC (hexane/EtOAc = 2/3 twice) to afford **S7** (19.3 mg, 69%) as a white powder.

<sup>1</sup>H NMR (CDCl<sub>3</sub>, 500 MHz) δ 7.85 (br s, 2H, Phth), 7.74 (br s, 2H, Phth), 7.38-7.27 (m, 6H, Ph, H-6), 6.61 (q, 1H, NH-Me, *J* = 4.6 Hz), 5.83 (d, 1H, H-1', *J*<sub>1',2'</sub> = 3.4 Hz), 5.75 (d, 1H, H-5, *J*<sub>5,6</sub> = 8.0 Hz), 5.51 (d, 1H, N-CH<sub>2</sub>-OBn, *J*<sub>gem</sub> = 9.7 Hz), 5.49 (d, 1H, N-CH<sub>2</sub>-OBn, *J*<sub>gem</sub> = 9.7 Hz), 5.26 (d, 1H, H-11', *J*<sub>11',10'</sub> = 8.6 Hz), 5.01 (d, 1H, H-1'', *J*<sub>1'',2''</sub> = 3.4 Hz), 4.93 (dd, 1H, H-3', *J*<sub>3',2'</sub> = 6.9, *J*<sub>3',4'</sub> = 4.9 Hz), 4.77-4.74 (m, 2H, H-2', H-9'), 4.71-4.67 (m, 4H, Bn, O-CH<sub>2</sub>-OMe), 4.32 (t, 1H, H-10', *J* = 9.2 Hz), 4.16-4.11 (m, 2H, CH-CH<sub>3</sub>, H-5'), 4.09 (dd, 1H, H-8', *J*<sub>8',9'</sub> = 4.6, *J*<sub>8',7'</sub> = 1.7 Hz), 4.03-3.99 (m, 2H, H-4', H-7'), 3.91-3.84 (m, 2H, H-5'', H-6''), 3.66 (t, 1H, H-6'', *J* = 10.0 Hz), 3.51 (t, 1H, H-4'', *J* = 9.2 Hz), 3.46 (t, 1H, H-3'', *J* = 9.2 Hz), 3.43 (s, 3H, OMe), 3.24 (dd, 1H, H-2'', *J*<sub>2'',3''</sub> = 9.2, *J*<sub>2'',1''</sub> = 3.4 Hz), 2.64 (d, 3H, N-CH<sub>3</sub>, *J* = 4.6 Hz), 2.20 (m, 1H, H-6'), 1.77 (m, 1H, H-6'), 1.68 (s, 3H, isopropylidene), 1.60 (s, 3H, isopropylidene), 1.43 (s, 3H, isopropylidene), 1.37 (s, 3H, isopropylidene), 1.36 (s, 3H, isopropylidene), 1.33 (s, 3H, isopropylidene), 1.30 (d, 3H, CH-CH<sub>3</sub>, *J*<sub>CH<sub>3</sub>,CH</sub> = 6.9 Hz); ESIMS-HR calcd for C<sub>52</sub>H<sub>66</sub>N<sub>7</sub>O<sub>19</sub> 1092.4413, found 1092.4406.

3-(Benzyloxymethyl)-1-((11*S*)-6,10-dideoxy-11-*O*-{2-acetamide-2-deoxy-4,6-*O*-isopropylidene-3-*O*-[(*R*)-1-(methylaminocarbonyl)ethyl]-α-*D*-gluco-hexopyranosyl}-2,3:8,9-di-*O*-isopropylidene-5-*O*-(methoxymethyl)-10-phthalimido-*L*-galacto-β-*D*-allo-undecodialdo-1,4-furanose-11,7-pyranos-1-yl)uracil (**S8**)

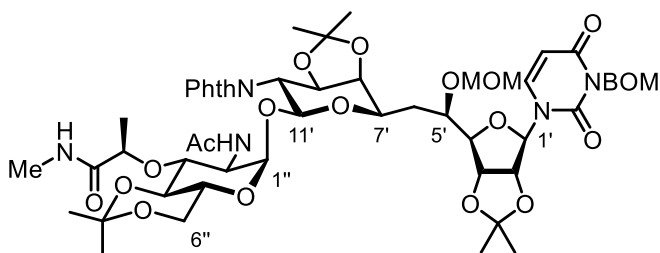

A solution of **S7** (19.1 mg, 17.5 μmol) in pyridine (1.2 mL) was treated with thioacetic acid (0.6 mL) at room temperature for 59 h under the dark condition. The reaction mixture was concentrated *in vacuo* and co-evaporated with toluene. The residue was purified by silica gel column chromatography (φ0.8×8 cm; CHCl<sub>3</sub>/MeOH = 0% → 3% gradually) to afford **S8** (8.2 mg, 42%) as a white powder.

<sup>1</sup>H NMR (CDCl<sub>3</sub>, 500 MHz) δ 7.88 (br s, 2H, Phth), 7.77 (m, 2H, Phth), 7.38-7.27 (m, 6H, Ph, H-6), 6.44 (q, 1H, NH-Me, *J* = 5.2 Hz), 5.93 (d, 1H, AcNH, *J* = 8.6 Hz), 5.88 (1H, H-1', *J*<sub>1',2'</sub> = 3.4 Hz), 5.76 (d, 1H, H-5, *J*<sub>5,6</sub> = 8.0 Hz), 5.52 (d, 1H, N-CH<sub>2</sub>-OBn, *J*<sub>gem</sub> = 9.7 Hz), 5.48 (d, 1H, N-CH<sub>2</sub>-OBn, *J*<sub>gem</sub> = 9.7 Hz), 5.16 (d, 1H, H-11', *J*<sub>11',10'</sub> = 8.6 Hz), 4.93 (d, 1H, H-1'', *J*<sub>1'',2''</sub> = 4.0 Hz), 4.91 (dd, 1H, H-3', *J*<sub>3',2'</sub> = 6.9, *J*<sub>3',4'</sub> = 4.6 Hz), 4.78 (dd, 1H, H-9', *J*<sub>9',10'</sub> = 8.6, *J*<sub>9',8'</sub> = 5.2 Hz), 4.74 (dd, 1H, H-2', *J*<sub>2',3'</sub> = 6.9, *J*<sub>2',1'</sub> = 3.4 Hz), 4.71-4.67 (m, 4H, Bn, O-CH<sub>2</sub>-OMe), 4.30 (t, 1H, H-10', *J* = 8.6 Hz), 4.14 (br d, 1H, H-5', *J* = 10.3 Hz), 4.10 (dd, 1H, H-8', *J*<sub>8',9'</sub> = 5.2, *J*<sub>8',7'</sub> = 2.0 Hz), 4.03-3.97 (m, 3H, H-4', H-7', H-2''), 3.94 (q, 1H, CH-CH<sub>3</sub>, *J* = 6.9 Hz), 3.88 (td, 1H, H-5'', *J* = 10.3, *J*<sub>5'',6''</sub> = 5.2 Hz), 3.82 (dd, 1H, H-6'', *J*<sub>gem</sub> = 10.3, *J*<sub>6'',5''</sub> = 5.2 Hz), 3.67 (t, 1H, H-6'', *J* = 10.6 Hz), 3.56 (t, 1H, H-4'', *J* = 9.5 Hz), 3.41 (s, 3H, OMe), 3.35 (t, 1H, H-3'', *J* = 9.7 Hz), 2.76 (d, 3H, N-CH<sub>3</sub>, *J* = 5.2 Hz), 2.19 (ddd, 1H, H-6', *J*<sub>gem</sub> = 14.9, *J* = 10.9, *J* = 2.0 Hz), 1.81 (ddd, 1H, H-6', *J*<sub>gem</sub> = 14.9, *J* = 9.7, *J* = 2.3 Hz), 1.65, 1.60, 1.44, 1.37, 1.35, 1.33, 1.32 (each s, each 3H, isopropylidene×3, Ac), 1.32 (d, 3H, CH-CH<sub>3</sub>, *J* = 6.9 Hz); ESIMS-HR calcd for C<sub>54</sub>H<sub>70</sub>N<sub>5</sub>O<sub>20</sub> 1108.4614, found 1108.4617.

3-(Benzyloxymethyl)-1-((1*S*)-6,10-dideoxy-11-*O*-{2-acetamide-2-deoxy-4,6-*O*-isopropylidene-3-*O*-[(*R*)-1-(methylaminocarbonyl)ethyl]- $\alpha$ -D-gluco-hexopyranosyl]-2,3:8,9-di-*O*-isopropylidene-5-*O*-(methoxymethyl)-10-(13-methyltetradec-2-enamido)-L-galacto- $\beta$ -D-allo-undecodialdo-1,4-furanose-11,7-pyranos-1-yl)uracil (**S10**)

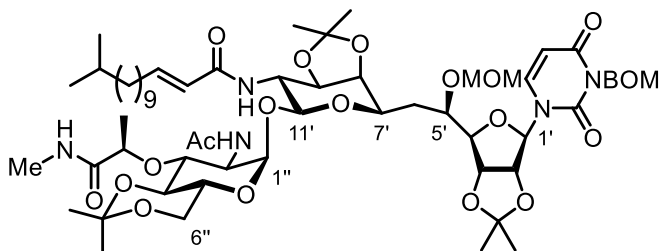

A solution of **S8** (8.1 mg, 7.31  $\mu$ mol) in EtOH (0.5 mL) was treated with ethylenediamine (50  $\mu$ L) and the mixture was heated at 80  $^{\circ}$ C for 9 h. The reaction mixture was cooled to room temperature, concentrated *in vacuo* and co-evaporated with toluene. The residue was purified by silica gel column chromatography

( $\phi$ 0.5 $\times$ 3 cm, treated with 0.1% Et<sub>3</sub>N; CHCl<sub>3</sub>/MeOH = 0%  $\rightarrow$  5%  $\rightarrow$  10%) to afford the crude amine. A solution of the amine in CH<sub>2</sub>Cl<sub>2</sub> (0.5 mL) was treated with Et<sub>3</sub>N (3.04  $\mu$ L, 21.9  $\mu$ mol), HOAt (1.5 mg, 11.0  $\mu$ mol), **S9** (2.6 mg, 11.0  $\mu$ mol) and EDCI (2.2 mg, 11.7  $\mu$ mol) sequentially at room temperature for 6 h. The reaction mixture was concentrated *in vacuo*, and the residue was purified by silica gel column chromatography ( $\phi$ 0.5 $\times$ 4 cm; hexane/EtOAc = 1/1  $\rightarrow$  CHCl<sub>3</sub>/MeOH = 0%  $\rightarrow$  2%) to afford **S10** (4.2 mg, 48%) as a white powder.

<sup>1</sup>H NMR (CDCl<sub>3</sub>, 500 MHz)  $\delta$  7.38-7.27 (m, 6H, Ph, H-6), 6.89-6.83 (m, 2H, CH=CH $\beta$ , NH-Me), 6.52 (d, 1H, AcNH,  $J$  = 9.7 Hz), 6.05 (br d, 1H, NH-10',  $J$  = 5.7 Hz), 5.86-5.82 (m, 2H, H-1', CH=CH $\alpha$ ), 5.74 (d, 1H, H-5,  $J_{5,6}$  = 8.0 Hz), 5.50 (d, 1H, N-CH<sub>2</sub>-OBn,  $J_{gem}$  = 9.7 Hz), 5.47 (d, 1H, N-CH<sub>2</sub>-OBn,  $J_{gem}$  = 9.7 Hz), 4.94-4.92 (m, 2H, H-11', H-1''), 4.89 (dd, 1H, H-3',  $J_{3',2'}$  = 6.9,  $J_{3',4'}$  = 4.3 Hz), 4.73 (dd, 1H, H-2',  $J_{2',3'}$  = 6.9,  $J_{2',1'}$  = 2.9 Hz), 4.70 (s, 2H, Bn), 4.66 (s, 2H, O-CH<sub>2</sub>-OMe), 4.40 (dd, 1H, H-9',  $J_{9',10'}$  = 8.6,  $J_{9',8'}$  = 5.2 Hz), 4.24 (td, 1H, H-2'',  $J$  = 9.7,  $J_{2'',1''}$  = 3.4 Hz), 4.04-3.98 (m, 4H, H-4', H-5', H-7', H-8'), 3.92 (td, 1H, H-5'',  $J$  = 10.3,  $J_{5'',6''}$  = 5.2 Hz), 3.88 (q, 1H, CH-CH<sub>3</sub>,  $J$  = 6.9 Hz), 3.85 (dd, 1H, H-6'',  $J_{gem}$  = 10.3,  $J_{6'',5''}$  = 5.2 Hz), 3.69 (t, 1H, H-6'',  $J$  = 10.5 Hz), 3.60 (t, 1H, H-4'',  $J$  = 9.5 Hz), 3.46-3.39 (m, 2H, H-10', H-3''), 3.37 (s, 3H, OMe), 2.78 (d, 3H, N-CH<sub>3</sub>,  $J$  = 5.2 Hz), 2.17-2.09 (m, 3H, H-6', side chain CH<sub>2</sub> $\gamma$ ), 1.90 (s, 3H, Ac), 1.76 (m, 1H, H-6'), 1.58-1.12 (m, 38H, isopropylidene $\times$ 3, CH<sub>2</sub> $\times$ 8, CH $\times$ 2), 0.86 (d, 6H, CH-(CH<sub>3</sub>)<sub>2</sub>,  $J$  = 6.3 Hz); ESIMS-HR calcd for C<sub>61</sub>H<sub>94</sub>N<sub>5</sub>O<sub>19</sub> 1200.6543, found 1200.6523.

#### unicamycin MurNAc analogue

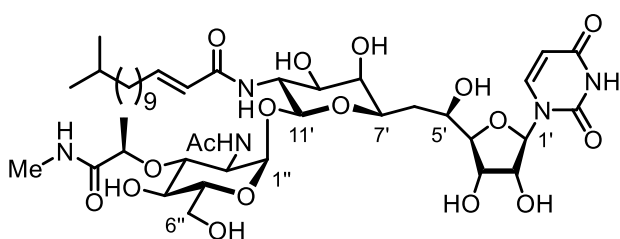

A solution of **S10** (4.2 mg, 3.50  $\mu$ mol) in CH<sub>2</sub>Cl<sub>2</sub> (0.5 mL) was treated with BCl<sub>3</sub> (1 M in CH<sub>2</sub>Cl<sub>2</sub>, 105  $\mu$ L, 105  $\mu$ mol) at -78  $^{\circ}$ C for 15 min, and the mixture was stirred at 0  $^{\circ}$ C for 30 min. Sodium methoxide (5 M in MeOH, 105  $\mu$ L, 525  $\mu$ mol) was added to the mixture at 0  $^{\circ}$ C, and the resulting mixture was stirred at room temperature for 10

min. The mixture was neutralized with Dowex 50W $\times$ 4 and the insoluble solid was filtered off. The filtrate was concentrated *in vacuo*, the residue was purified by HPLC (YMC-Pack R&D ODS D-ODS-5-A, 250  $\times$  20 mm, 0.1% TFA 60% MeCN/H<sub>2</sub>O) to afford uncamycin MurNAc analogue (3.1 mg, 97%) as a white solid.

<sup>1</sup>H NMR (CD<sub>3</sub>OD, 500 MHz)  $\delta$  7.92 (d, 1H, H-6,  $J_{6,5}$  = 8.0 Hz), 6.81 (dt, 1, CH=CH $\beta$ ,  $J$  = 14.9,  $J$  = 7.2 Hz), 5.95-5.92 (m, 2H, H-1', CH=CH $\alpha$ ), 5.75 (d, 1H, H-5,  $J_{5,6}$  = 8.0 Hz), 4.93 (d, 1H, H-1'',  $J_{1'',2''}$  = 3.4 Hz), 4.61 (d, 1H, H-11',  $J_{11',10'}$  = 8.6 Hz), 4.22-4.16 (m, 3H, H-2', H-3', CH-CH<sub>3</sub>), 4.06-3.99 (m, 3H, H-5', H-10', H-5''), 3.97 (dd, 1H, H-2'',

$J_{2'',3''} = 10.3$ ,  $J_{2'',1''} = 3.4$  Hz), 3.86 (t, 1H, H-4',  $J = 3.3$  Hz), 3.82 (dd, 1H, H-6'',  $J_{\text{gem}} = 12.0$ ,  $J_{6'',5''} = 2.3$  Hz), 3.78 (br d, 1H, H-7',  $J = 10.0$  Hz), 3.69 (dd, 1H, H-6'',  $J_{\text{gem}} = 12.0$ ,  $J_{6'',5''} = 5.7$  Hz), 3.65 (m, 2H, H-8', H-9'), 3.58 (t, 1H, H-3'',  $J = 9.5$  Hz), 3.43 (t, 1H, H-4'',  $J = 9.5$  Hz), 2.73 (s, 3H, OMe), 2.20 (q, 2H, side chain  $\text{CH}_2\gamma$ ,  $J = 7.1$  Hz), 2.10 (m, 1H, H-6'), 1.88 (s, 3H, Ac), 1.57-1.43 (m, 4H, H-6', side chain CH,  $\text{CH}_2$ ), 1.37 (d, 3H, CH- $\text{CH}_3$ ,  $J = 6.9$  Hz), 1.37-1.15 (m, 14H,  $\text{CH}_2 \times 7$ ), 0.88 (d, 6H, side chain CH-( $\text{CH}_3$ )<sub>2</sub>,  $J = 7.1$  Hz); ESIMS-HR calcd for  $\text{C}_{42}\text{H}_{70}\text{N}_5\text{O}_{17}$  916.4767, found 916.4741.

14YAK8-9-2 (1H\_CDC13\_500 MHz)

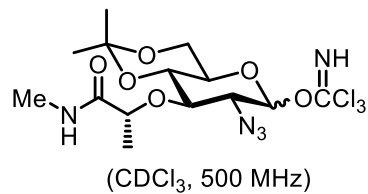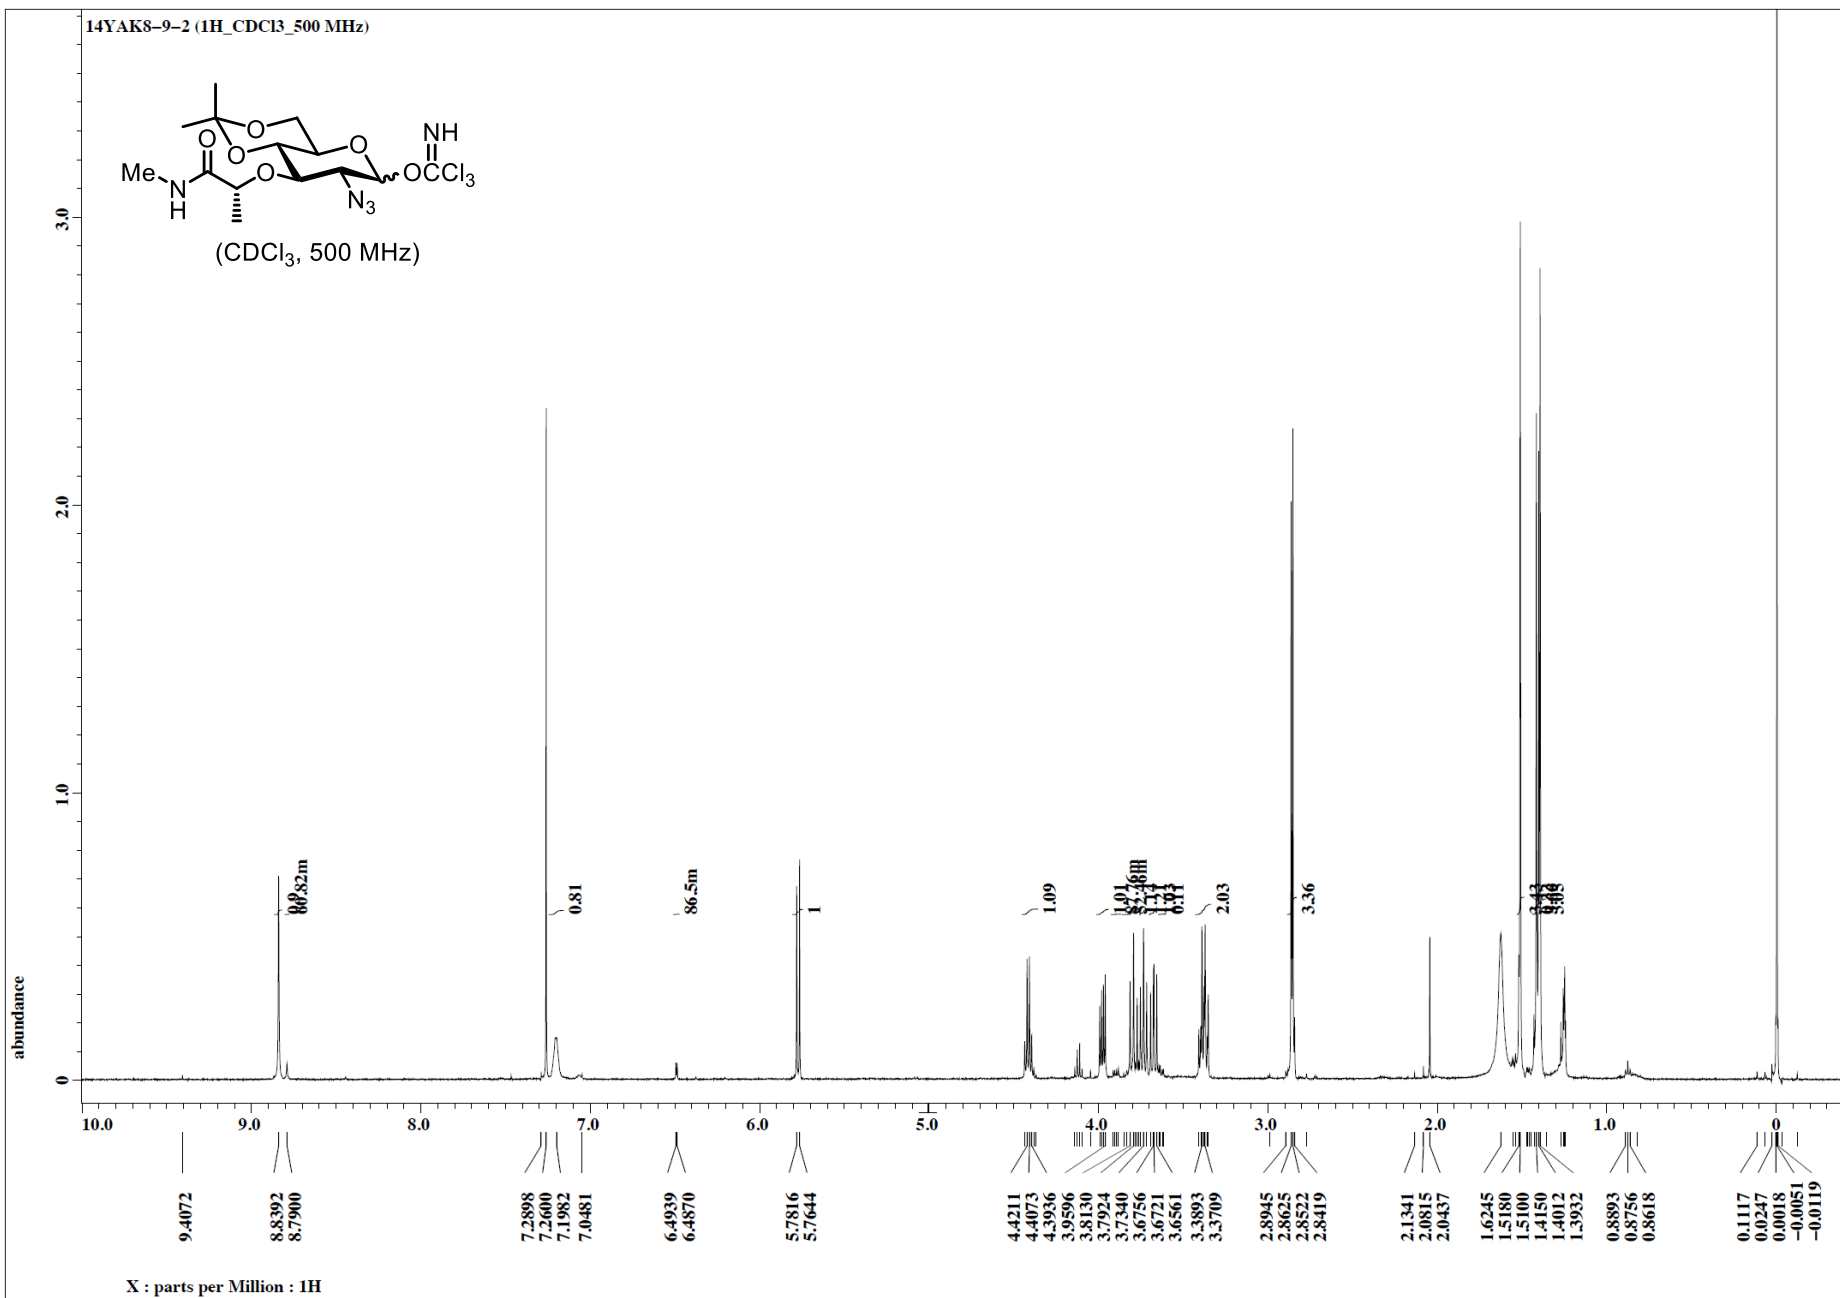



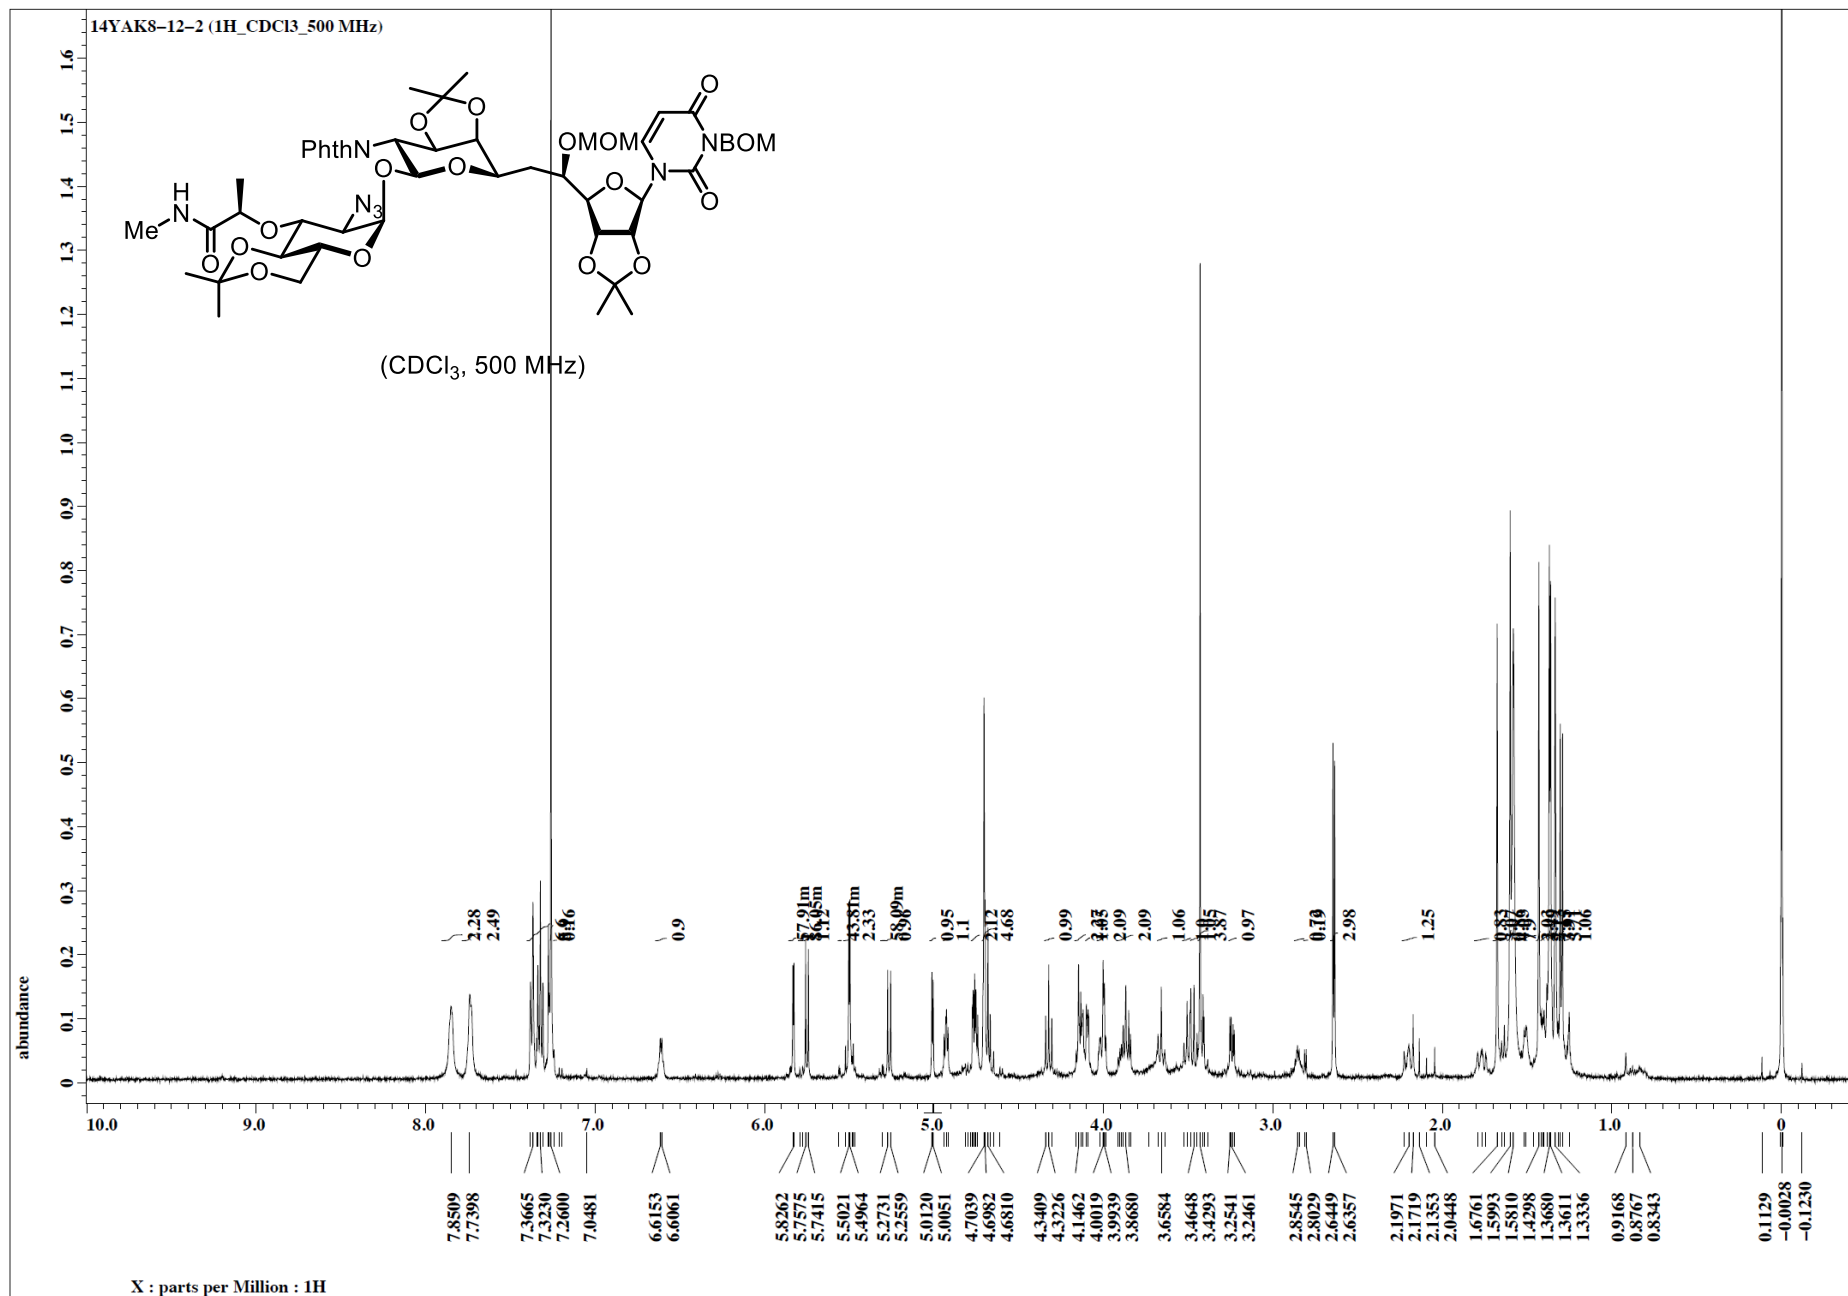

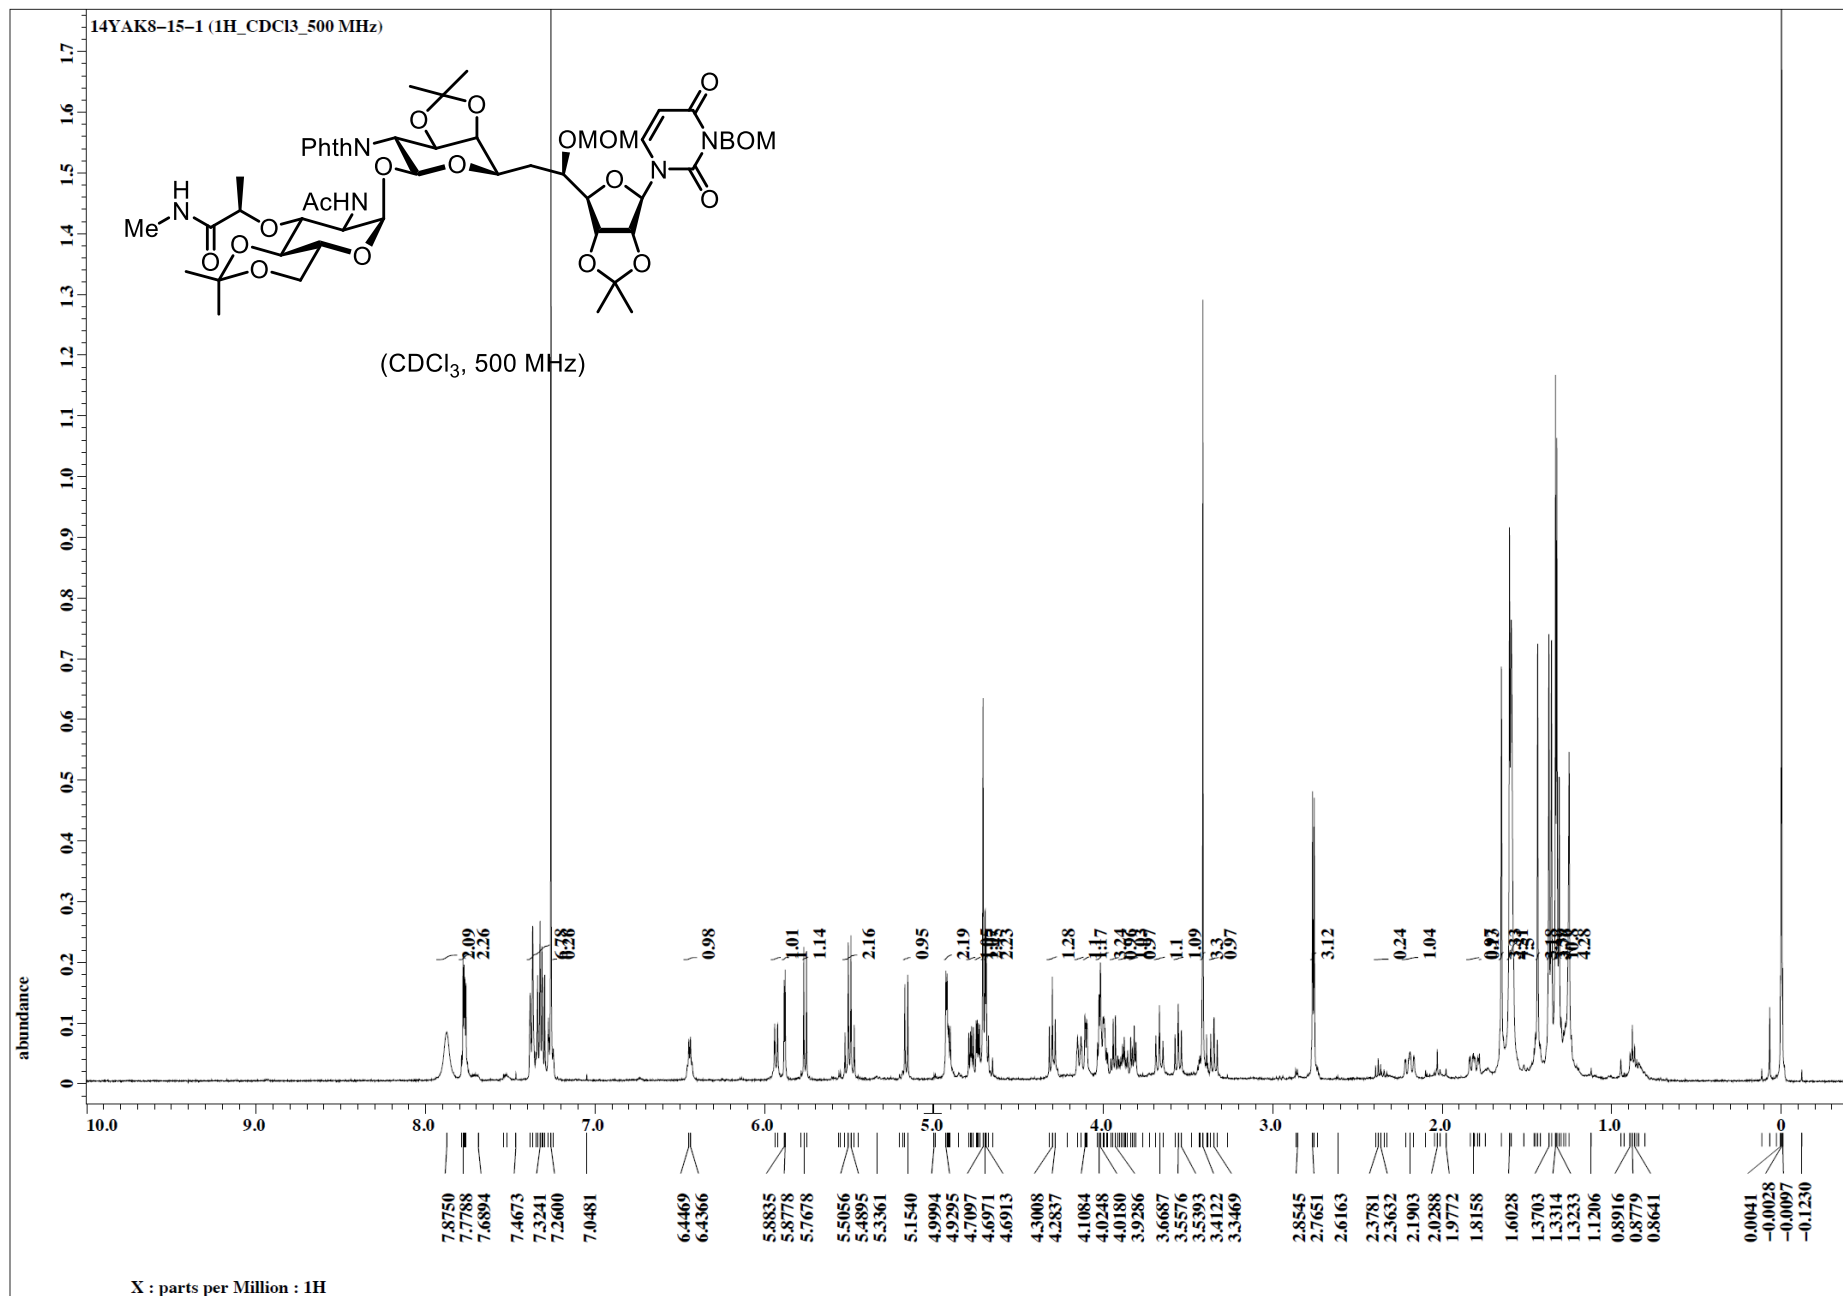

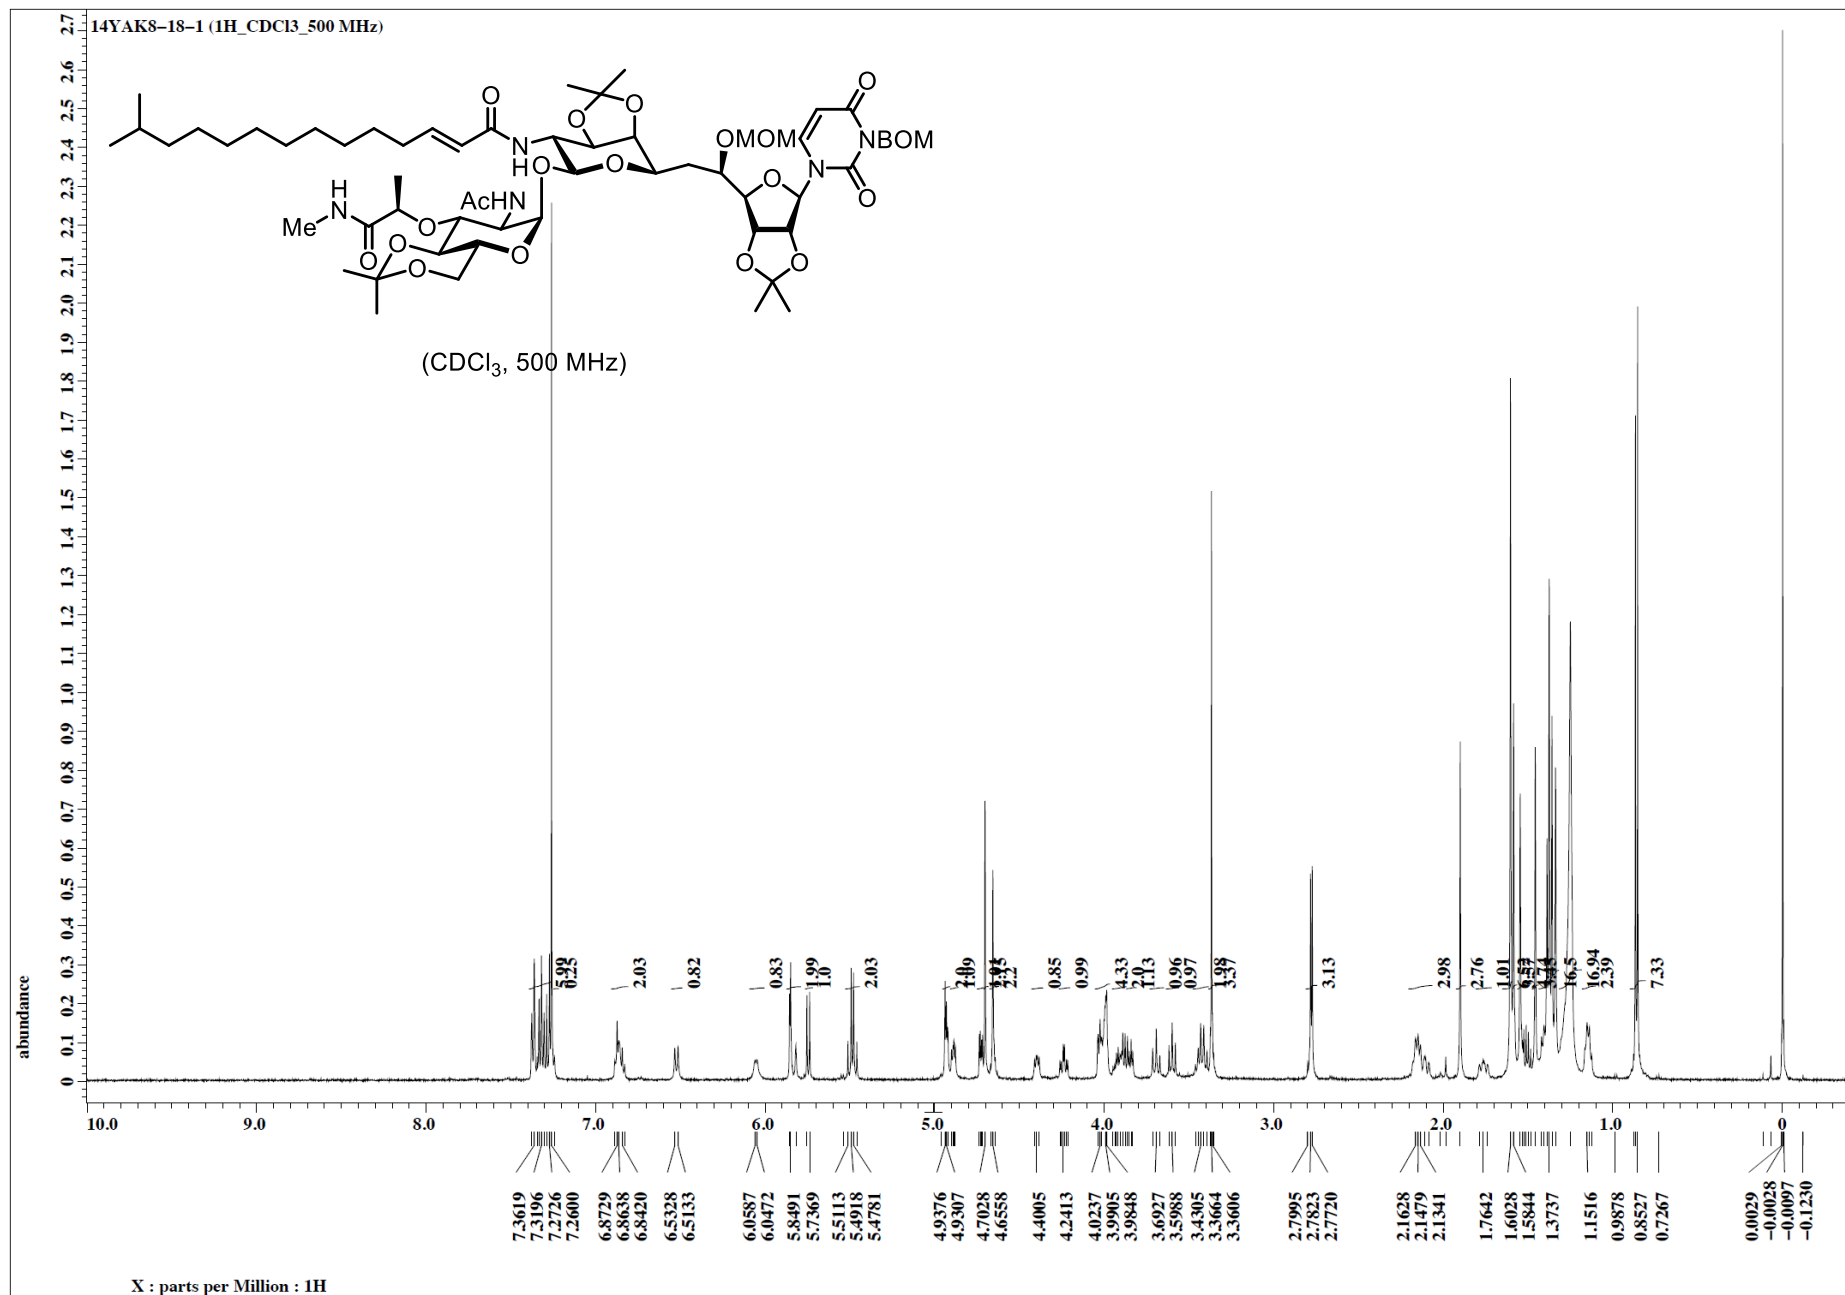

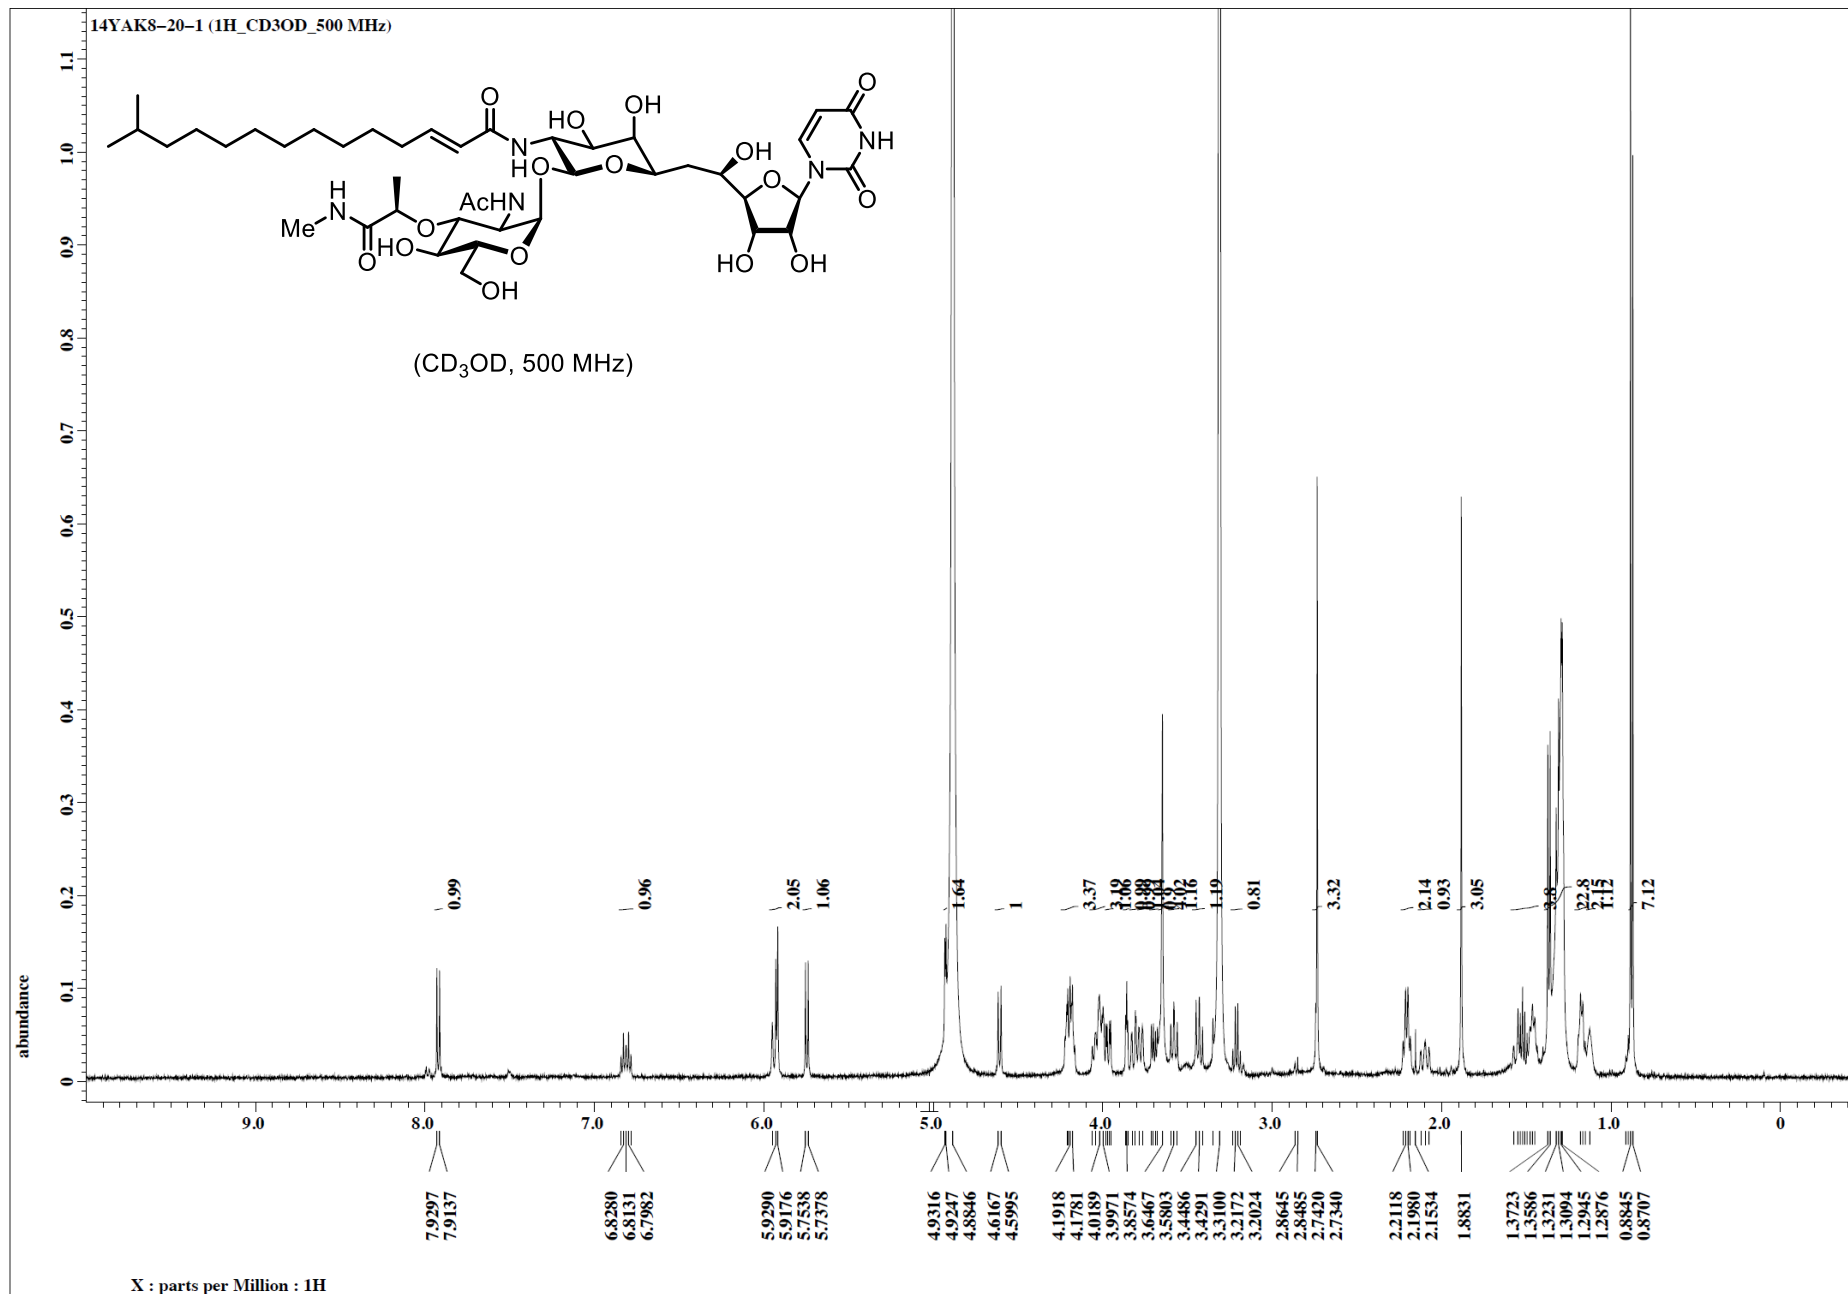

Single Mass Analysis

Tolerance = 5.0 PPM / DBE: min = -1.5, max = 50.0

Element prediction: Off

Monoisotopic Mass, Even Electron Ions

2786 formula(e) evaluated with 15 results within limits (all results (up to 1000) for each mass)

Elements Used:

C: 5-60 H: 10-100 N: 0-10 O: 0-20 Na: 0-1 S: 0-1

20171024\_4 no acid

14YAK8\_12\_2 1112 (4.083)

1: TOF MS ES+  
2.54e+005

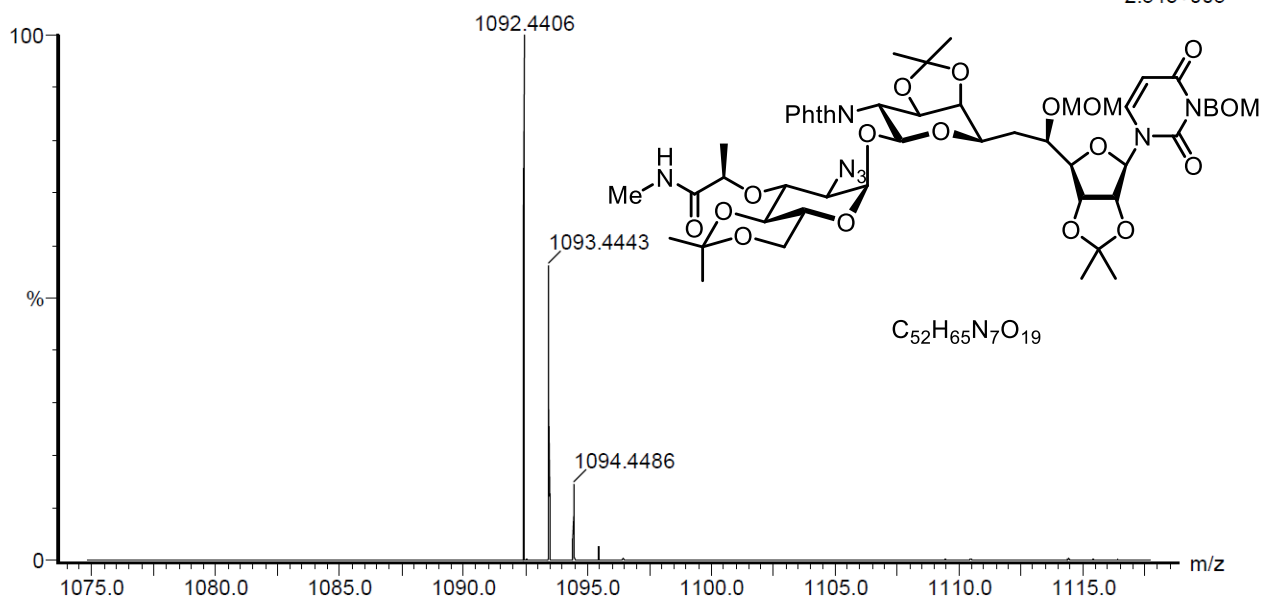

Minimum: -1.5  
Maximum: 3.0 5.0 50.0

| Mass      | Calc. Mass | mDa  | PPM  | DBE  | Formula             |
|-----------|------------|------|------|------|---------------------|
| 1092.4406 | 1092.4405  | 0.1  | 0.1  | 28.5 | C59 H67 N5 O12 Na S |
|           | 1092.4413  | -0.7 | -0.6 | 23.5 | C52 H66 N7 O19      |
|           | 1092.4415  | -0.9 | -0.8 | 26.5 | C60 H70 N O16 S     |
|           | 1092.4418  | -1.2 | -1.1 | 33.5 | C60 H63 N9 O8 Na S  |
|           | 1092.4391  | 1.5  | 1.4  | 23.5 | C58 H71 N O16 Na S  |
|           | 1092.4423  | -1.7 | -1.6 | 15.5 | C47 H71 N7 O19 Na S |
|           | 1092.4389  | 1.7  | 1.6  | 20.5 | C50 H67 N7 O19 Na   |
|           | 1092.4388  | 1.8  | 1.6  | 27.5 | C56 H66 N7 O14 S    |
|           | 1092.4430  | -2.4 | -2.2 | 24.5 | C55 H67 N5 O17 Na   |
|           | 1092.4375  | 3.1  | 2.8  | 22.5 | C55 H70 N3 O18 S    |
|           | 1092.4443  | -3.7 | -3.4 | 29.5 | C56 H63 N9 O13 Na   |
|           | 1092.4447  | -4.1 | -3.8 | 18.5 | C49 H70 N7 O19 S    |
|           | 1092.4364  | 4.2  | 3.8  | 24.5 | C54 H67 N7 O14 Na S |
|           | 1092.4454  | -4.8 | -4.4 | 27.5 | C57 H66 N5 O17      |
|           | 1092.4355  | 5.1  | 4.7  | 32.5 | C59 H62 N7 O14      |

Single Mass Analysis

Tolerance = 5.0 mDa / DBE: min = -1.5, max = 50.0  
 Element prediction: Off

Monoisotopic Mass, Even Electron Ions

4032 formula(e) evaluated with 25 results within limits (all results (up to 1000) for each mass)

Elements Used:

C: 5-80 H: 10-100 N: 0-10 O: 0-25 Na: 0-1

20171101\_1 no acid  
 14YAK8\_15\_1 1076 (3.955)

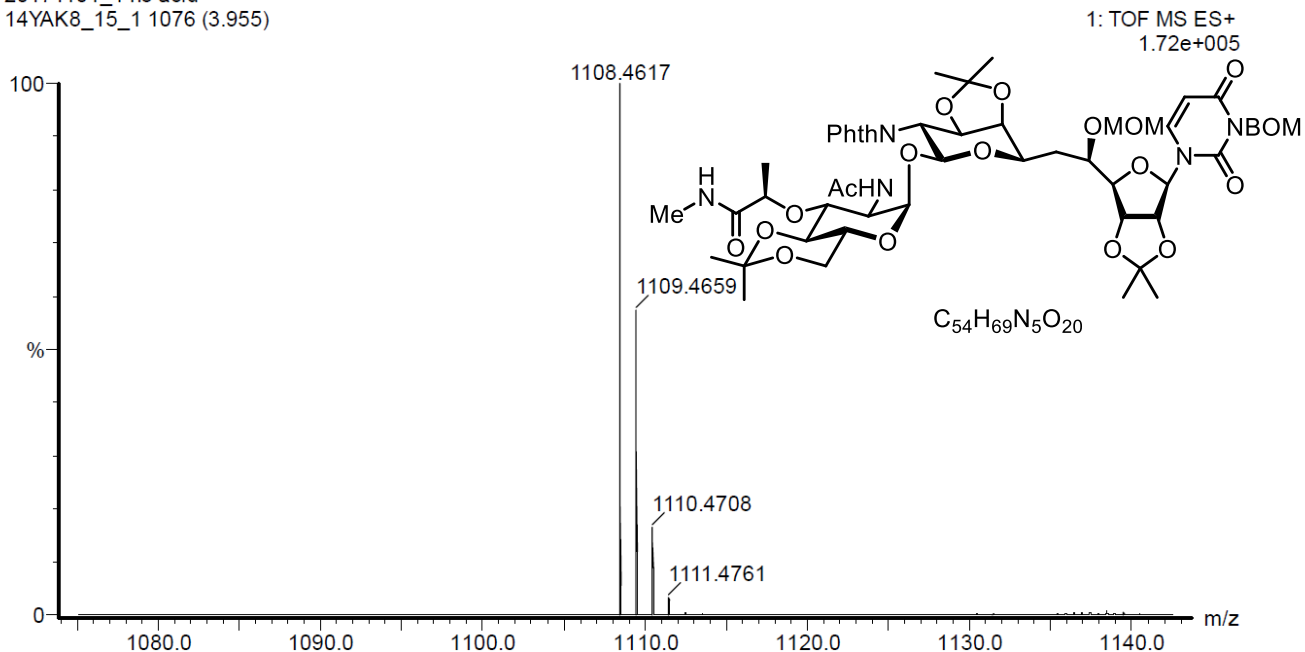

| Mass      | Calc. Mass | mDa  | PPM  | DBE  | Formula           |
|-----------|------------|------|------|------|-------------------|
| 1108.4617 | 1108.4614  | 0.3  | 0.3  | 22.5 | C54 H70 N5 O20    |
|           | 1108.4612  | 0.5  | 0.5  | 36.5 | C69 H67 N O11 Na  |
|           | 1108.4609  | 0.8  | 0.7  | 40.5 | C67 H62 N7 O9     |
|           | 1108.4625  | -0.8 | -0.7 | 41.5 | C70 H63 N5 O7 Na  |
|           | 1108.4628  | -1.1 | -1.0 | 27.5 | C55 H66 N9 O16    |
|           | 1108.4630  | -1.3 | -1.2 | 23.5 | C57 H71 N3 O18 Na |
|           | 1108.4603  | 1.4  | 1.3  | 24.5 | C53 H67 N9 O16 Na |
|           | 1108.4601  | 1.6  | 1.4  | 17.5 | C53 H74 N O24     |
|           | 1108.4636  | -1.9 | -1.7 | 39.5 | C71 H66 N O11     |
|           | 1108.4596  | 2.1  | 1.9  | 35.5 | C66 H66 N3 O13    |
|           | 1108.4639  | -2.2 | -2.0 | 46.5 | C71 H59 N9 O3 Na  |
|           | 1108.4644  | -2.7 | -2.4 | 28.5 | C58 H67 N7 O14 Na |
|           | 1108.4590  | 2.7  | 2.4  | 19.5 | C52 H71 N5 O20 Na |
|           | 1108.4585  | 3.2  | 2.9  | 37.5 | C65 H63 N7 O9 Na  |
|           | 1108.4649  | -3.2 | -2.9 | 44.5 | C72 H62 N5 O7     |
|           | 1108.4649  | -3.2 | -2.9 | 10.5 | C45 H75 N5 O25 Na |
|           | 1108.4654  | -3.7 | -3.3 | 26.5 | C59 H70 N3 O18    |
|           | 1108.4577  | 4.0  | 3.6  | 14.5 | C51 H75 N O24 Na  |
|           | 1108.4577  | 4.0  | 3.6  | 48.5 | C78 H62 N O6      |
|           | 1108.4574  | 4.3  | 3.9  | 18.5 | C49 H70 N7 O22    |
|           | 1108.4572  | 4.5  | 4.1  | 32.5 | C64 H67 N3 O13 Na |
|           | 1108.4662  | -4.5 | -4.1 | 15.5 | C46 H71 N9 O21 Na |
|           | 1108.4663  | -4.6 | -4.1 | 49.5 | C73 H58 N9 O3     |
|           | 1108.4569  | 4.8  | 4.3  | 36.5 | C62 H62 N9 O11    |
|           | 1108.4665  | -4.8 | -4.3 | 45.5 | C75 H63 N3 O5 Na  |

Single Mass Analysis

Tolerance = 5.0 mDa / DBE: min = -1.5, max = 50.0

Element prediction: Off

Monoisotopic Mass, Even Electron Ions

3287 formula(e) evaluated with 22 results within limits (all results (up to 1000) for each mass)

Elements Used:

C: 5-80 H: 10-100 N: 0-10 O: 0-25 Na: 0-1

20171101\_4 no acid  
14YAK8\_18\_1 1391 (5.115)

1: TOF MS ES+  
1.33e+005

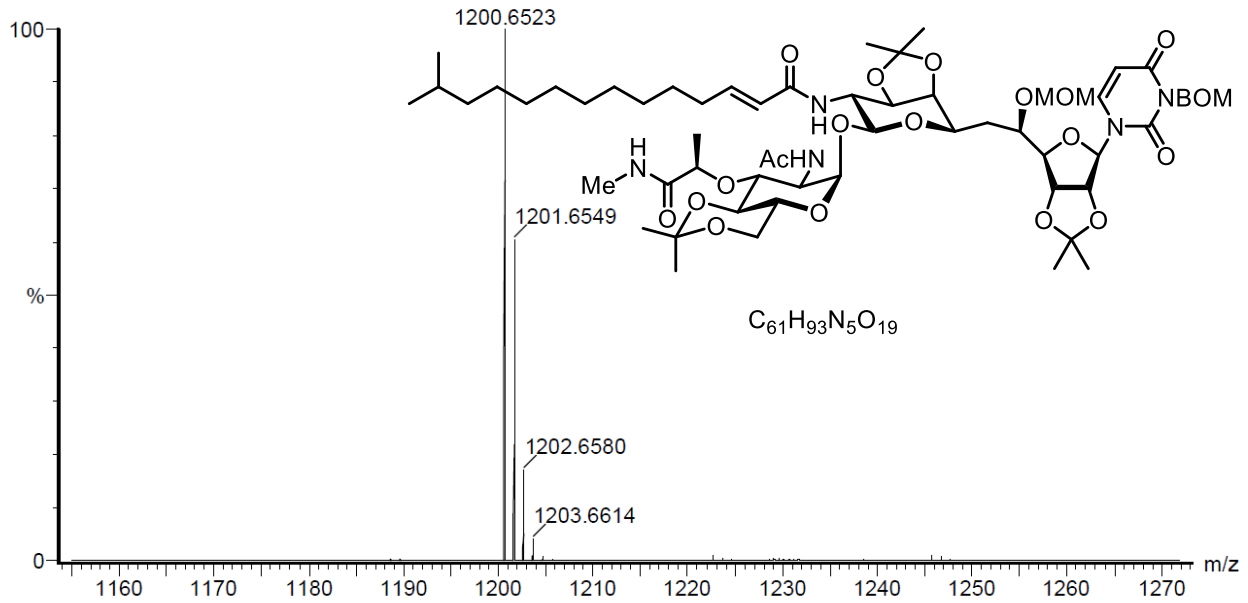

Minimum: -1.5  
Maximum: 5.0 5.0 50.0

| Mass      | Calc. Mass | mDa  | PPM  | DBE  | Formula           |
|-----------|------------|------|------|------|-------------------|
| 1200.6523 | 1200.6525  | -0.2 | -0.2 | 30.5 | C73 H90 N3 O12    |
|           | 1200.6519  | 0.4  | 0.3  | 14.5 | C59 H95 N5 O19 Na |
|           | 1200.6530  | -0.7 | -0.6 | 12.5 | C60 H98 N O23     |
|           | 1200.6514  | 0.9  | 0.7  | 32.5 | C72 H87 N7 O8 Na  |
|           | 1200.6532  | -0.9 | -0.7 | 19.5 | C60 H91 N9 O15 Na |
|           | 1200.6538  | -1.5 | -1.2 | 35.5 | C74 H86 N7 O8     |
|           | 1200.6506  | 1.7  | 1.4  | 9.5  | C58 H99 N O23 Na  |
|           | 1200.6541  | -1.8 | -1.5 | 31.5 | C76 H91 N O10 Na  |
|           | 1200.6503  | 2.0  | 1.7  | 13.5 | C56 H94 N7 O21    |
|           | 1200.6543  | -2.0 | -1.7 | 17.5 | C61 H94 N5 O19    |
|           | 1200.6500  | 2.3  | 1.9  | 27.5 | C71 H91 N3 O12 Na |
|           | 1200.6498  | 2.5  | 2.1  | 31.5 | C69 H86 N9 O10    |
|           | 1200.6554  | -3.1 | -2.6 | 36.5 | C77 H87 N5 O6 Na  |
|           | 1200.6556  | -3.3 | -2.7 | 22.5 | C62 H90 N9 O15    |
|           | 1200.6489  | 3.4  | 2.8  | 8.5  | C55 H98 N3 O25    |
|           | 1200.6559  | -3.6 | -3.0 | 18.5 | C64 H95 N3 O17 Na |
|           | 1200.6484  | 3.9  | 3.2  | 26.5 | C68 H90 N5 O14    |
|           | 1200.6565  | -4.2 | -3.5 | 34.5 | C78 H90 N O10     |
|           | 1200.6567  | -4.4 | -3.7 | 41.5 | C78 H83 N9 O2 Na  |
|           | 1200.6479  | 4.4  | 3.7  | 10.5 | C54 H95 N7 O21 Na |
|           | 1200.6474  | 4.9  | 4.1  | 28.5 | C67 H87 N9 O10 Na |
|           | 1200.6573  | -5.0 | -4.2 | 23.5 | C65 H91 N7 O13 Na |

Single Mass Analysis

Tolerance = 5.0 mDa / DBE: min = -1.5, max = 50.0

Element prediction: Off

Monoisotopic Mass, Even Electron Ions

4104 formula(e) evaluated with 24 results within limits (all results (up to 1000) for each mass)

Elements Used:

C: 5-80 H: 10-100 N: 0-10 O: 0-25 Na: 0-1

20171101\_5 no acid

14YAK8\_20\_1 959 (3.525)

1: TOF MS ES+  
1.09e+005

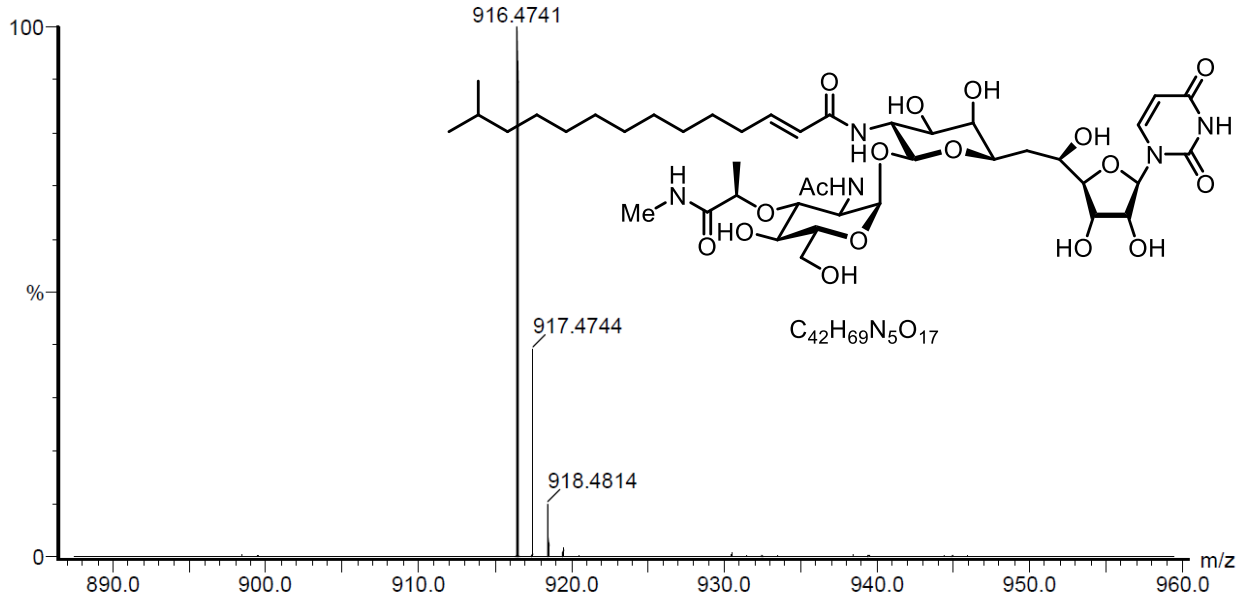

Minimum: -1.5  
Maximum: 5.0 5.0 50.0

| Mass     | Calc. Mass | mDa  | PPM  | DBE  | Formula           |
|----------|------------|------|------|------|-------------------|
| 916.4741 | 916.4743   | -0.2 | -0.2 | 7.5  | C40 H71 N5 O17 Na |
|          | 916.4738   | 0.3  | 0.3  | 25.5 | C53 H63 N7 O6 Na  |
|          | 916.4748   | -0.7 | -0.8 | 23.5 | C54 H66 N3 O10    |
|          | 916.4730   | 1.1  | 1.2  | 36.5 | C66 H62 N O3      |
|          | 916.4729   | 1.2  | 1.3  | 2.5  | C39 H75 N O21 Na  |
|          | 916.4753   | -1.2 | -1.3 | 5.5  | C41 H74 N O21     |
|          | 916.4756   | -1.5 | -1.6 | 12.5 | C41 H67 N9 O13 Na |
|          | 916.4726   | 1.5  | 1.6  | 6.5  | C37 H70 N7 O19    |
|          | 916.4724   | 1.7  | 1.9  | 20.5 | C52 H67 N3 O10 Na |
|          | 916.4721   | 2.0  | 2.2  | 24.5 | C50 H62 N9 O8     |
|          | 916.4762   | -2.1 | -2.3 | 28.5 | C55 H62 N7 O6     |
|          | 916.4764   | -2.3 | -2.5 | 24.5 | C57 H67 N O8 Na   |
|          | 916.4767   | -2.6 | -2.8 | 10.5 | C42 H70 N5 O17    |
|          | 916.4713   | 2.8  | 3.1  | 1.5  | C36 H74 N3 O23    |
|          | 916.4708   | 3.3  | 3.6  | 19.5 | C49 H66 N5 O12    |
|          | 916.4706   | 3.5  | 3.8  | 33.5 | C64 H63 N O3 Na   |
|          | 916.4778   | -3.7 | -4.0 | 29.5 | C58 H63 N5 O4 Na  |
|          | 916.4703   | 3.8  | 4.1  | 37.5 | C62 H58 N7 O      |
|          | 916.4702   | 3.9  | 4.3  | 3.5  | C35 H71 N7 O19 Na |
|          | 916.4780   | -3.9 | -4.3 | 15.5 | C43 H66 N9 O13    |
|          | 916.4783   | -4.2 | -4.6 | 11.5 | C45 H71 N3 O15 Na |
|          | 916.4697   | 4.4  | 4.8  | 21.5 | C48 H63 N9 O8 Na  |
|          | 916.4695   | 4.6  | 5.0  | 14.5 | C48 H70 N O16     |
|          | 916.4788   | -4.7 | -5.1 | 27.5 | C59 H66 N O8      |
